# Supplementary material
Source: publisher figshare collection journal article supplement (https://plos.figshare.com/articles/dataset/_/5993989)
Supplement: Supplementary file 1 [file 1]

Archive with 8 entries (8 files):
- S1 Fig.tif
- S2 Fig.tif
- S3 Fig.tif
- S4 Fig.jpg
- S1 Video.mp4
- S1 File.pdf
- S2 File.pdf
- S3 File.docx
