# Supplementary material
Source: publisher figshare collection journal article supplement (https://plos.figshare.com/articles/dataset/_/5993989)

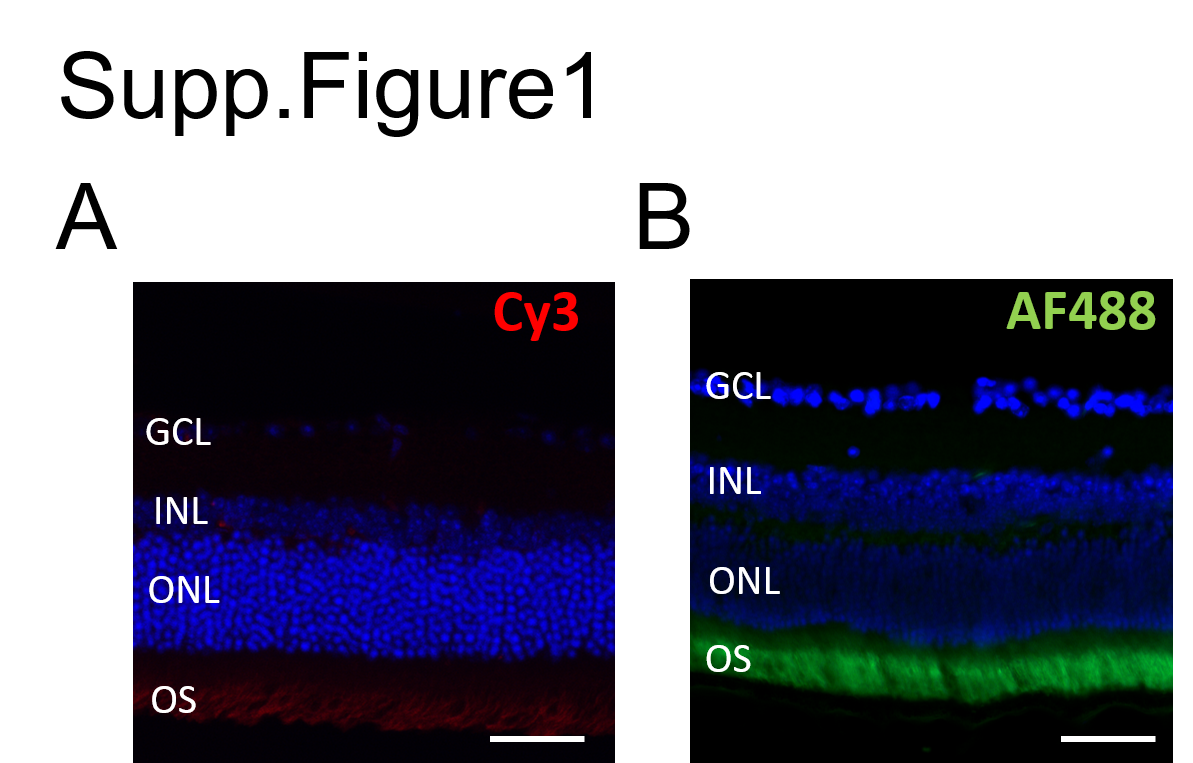

Supplement: Supplementary file 1 [file 1 › S1 Fig.tif]

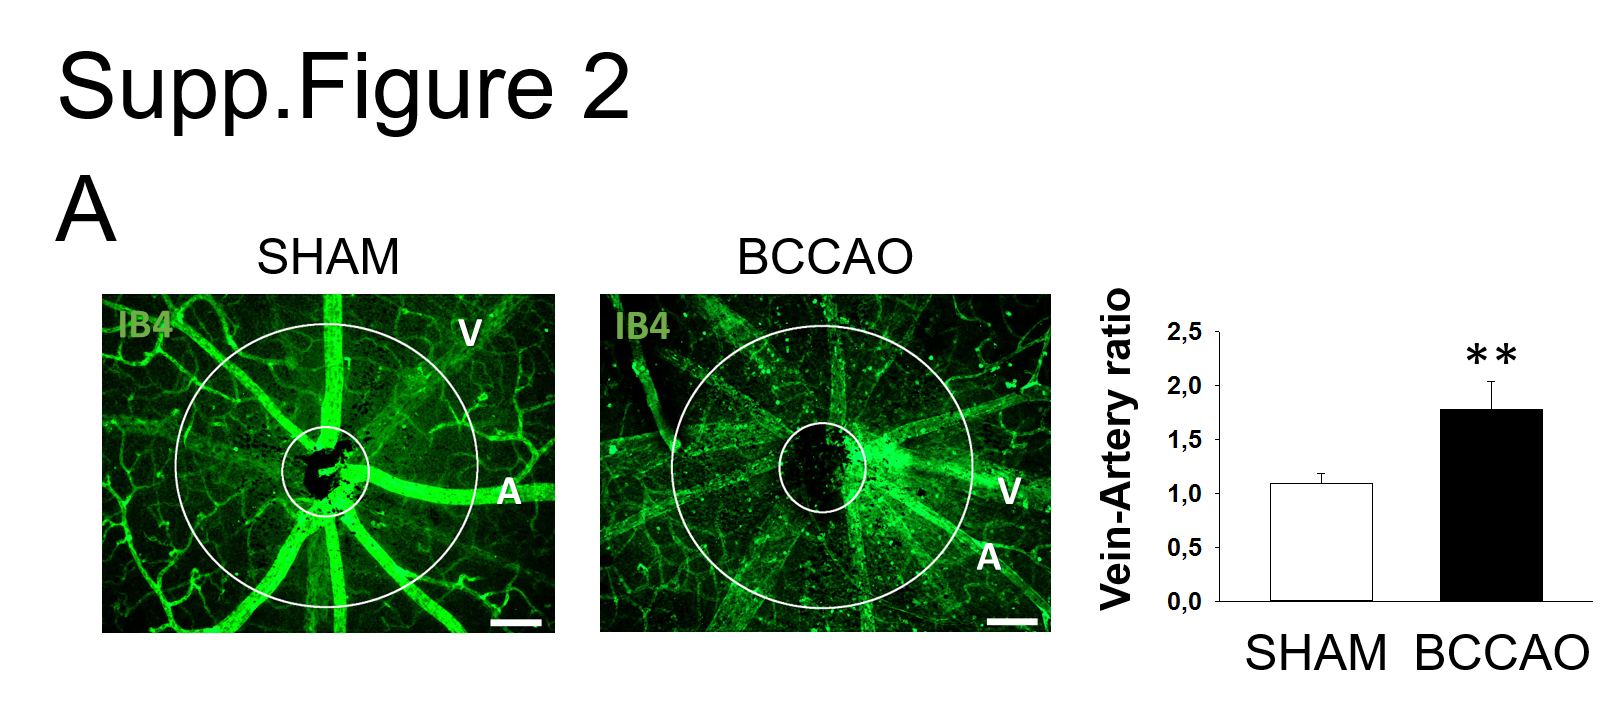

Supplement: Supplementary file 1 [file 1 › S2 Fig.tif]

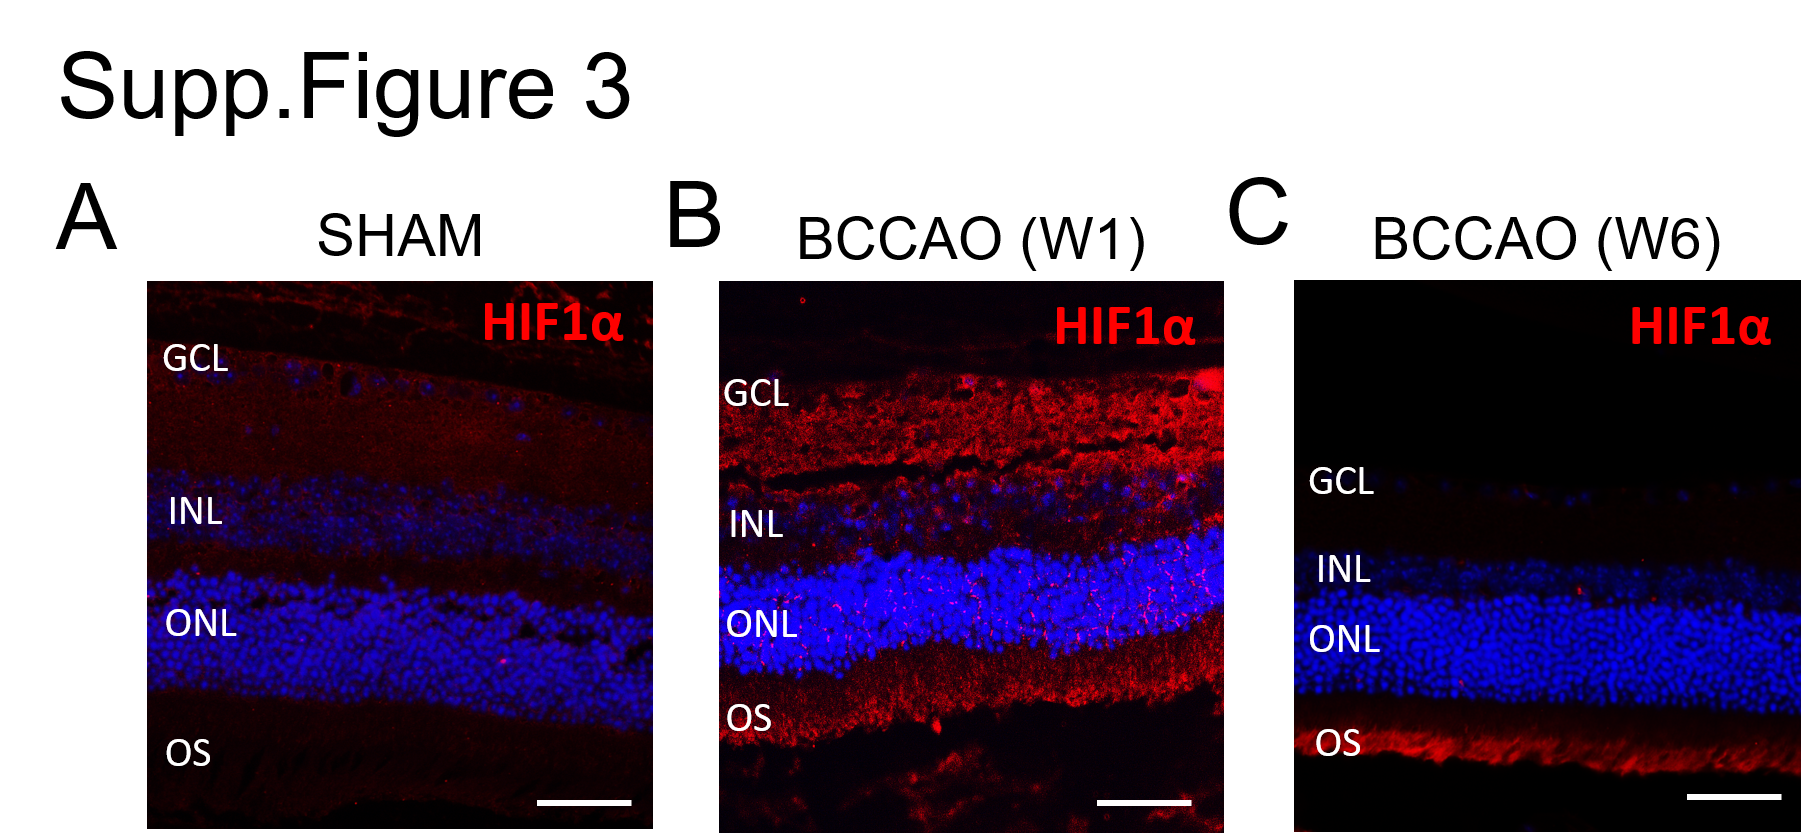

Supplement: Supplementary file 1 [file 1 › S3 Fig.tif]

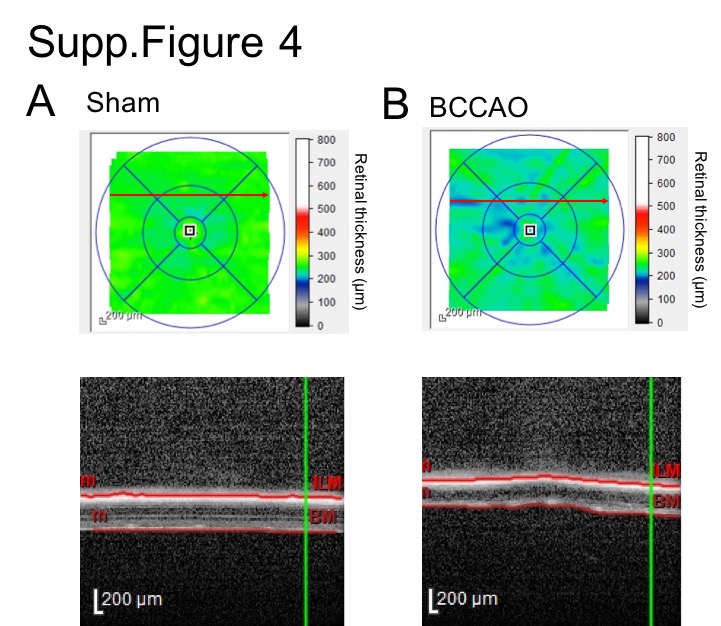

Supplement: Supplementary file 1 [file 1 › S4 Fig.jpg]
